# Supplementary material for: Application of cyanobacteria for chiral phosphonate synthesis
Source: Royal Society of Chemistry journal article supplement (doi:10.1039/c5gc01195g), 2015-01-01
Supplement: c5gc01195g1.pdf [file c5gc01195g1.pdf]

## Supporting Information for

### Application of cyanobacteria for chiral phosphonates synthesis

M. Górak, E. Żymańczyk-Duda

*Department of Bioorganic Chemistry, Wrocław University of Technology, Wybrzeże Wyspiańskiego 27,  
50-370 Wrocław, Poland. E-mail: monika.gorak@pwr.edu.pl; ewa.zymanczyk-duda@pwr.edu.pl.*

#### Experimental

#### Determination of the absolute configuration of diethyl 2-hydroxyphosphonates (**1a**, **2a**, **3a**)

This was accomplished according to Mosher's method.<sup>1</sup> Thus, the examined sample consisted of 0.1 mmol of a particular diethyl 2-hydroxyphosphonate (a mixture of both enantiomers, ratio 10:1) dissolved in a mixture of solvents composed of dry dichloromethane (300  $\mu$ L) and dry pyridine (300  $\mu$ L), followed by the addition of 0.14 mmol of (*S*)-(+)-MTPA-Cl. The reaction mixture was left for 3 days at room temperature. Then, the excess volume of 3-dimethyl-amino-1-propylamine (0.20 mmol) was added and after 5 min. at room temperature, the mixture was diluted with diethyl ether (10 mL), washed by a cold solution of 5% HCl (10 mL) and water (10 mL), then the organic layer was dried over anhydrous MgSO<sub>4</sub>. Solid residues were removed by filtration, the ether fraction was evaporated and the final acylated products were purified by means of FPLC (flash column Puriflash C18HP 15 $\mu$ m, 120G). The initial mobile phase composition was 70% water and 30% acetonitrile (v/v). The composition was linearly changed to 100% acetonitrile in 40 min., at a flow rate of 15 mL/min., detection was performed at 220 nm. The retention times of the (*R*)-MTPA diastereoisomers were as follows: **1a**-(*R*)-MTPA 30 min., **2a**-(*R*)-MTPA 34 min., **3a**-(*R*)-MTPA 32 min.

The absolute configuration was determined by <sup>1</sup>H and <sup>31</sup>P NMR spectroscopic analyses of the resultant Mosher esters (Scheme 1).

The absolute configuration was confirmed by the measurement of the optical rotation ( $[\alpha]_D^{25}$ ) of the methanol solutions of hydroxyphosphonates (polarimeter PolAAr 31), according to the literature.<sup>2</sup>

**A.**

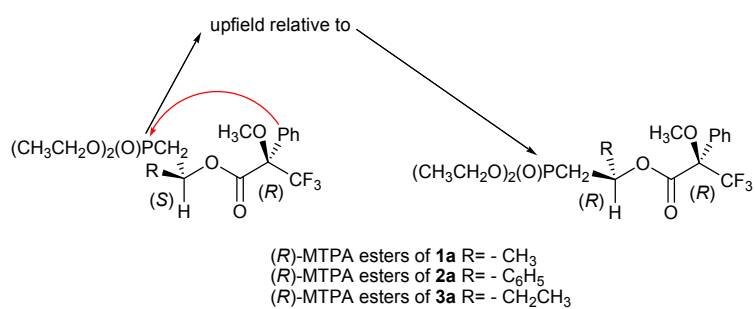

**B.**

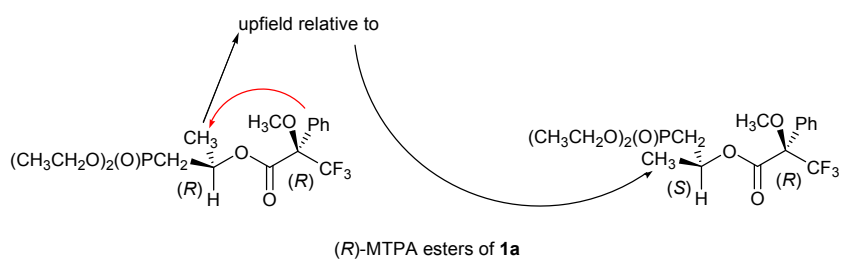

**C.**

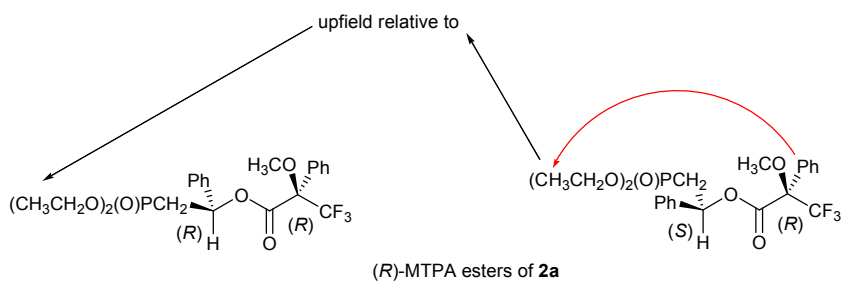

**D.**

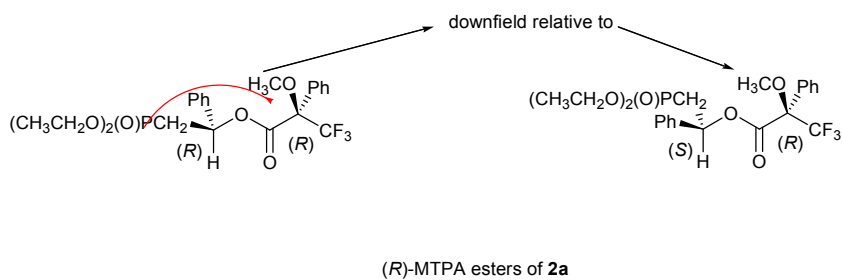

**E.**

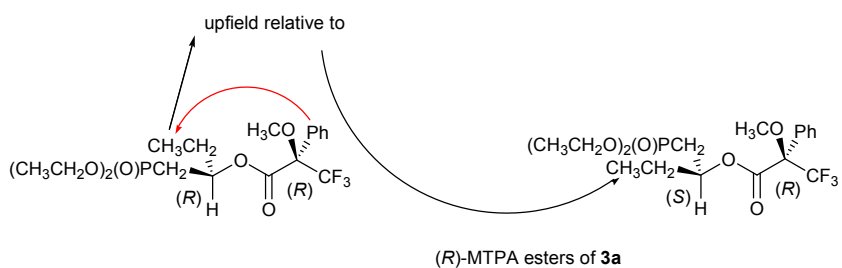

F.

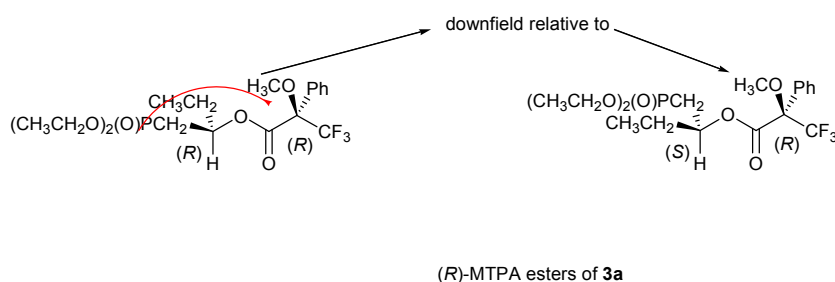

**Scheme 1** Configuration correlation models for (*R*)-MTPA esters. A, B, C, E—the effect of the phenyl group of the Mosher's ester. D, F—the effect of the phosphonate group of hydroxyphosphonate.

## Spectroscopic data

### (*R*)-MTPA esters of 1a

Diastereoisomer (*R,R*).  $^{31}\text{P}$  NMR (600 MHz,  $\text{CDCl}_3$ )  $\delta$  (ppm) 25.22;  $^1\text{H}$  NMR (600 MHz,  $\text{CDCl}_3$ )  $\delta$  (ppm) 1.27-1.37 (m, 6 H,  $\text{P}(\text{O})(\text{OCH}_2\text{CH}_3)$ ), 1.45 (d, 3 H,  $J=6.1$  Hz,  $\text{CH}_3$ ), 2.0-2.3 (m, 2 H,  $\text{CH}_2\text{P}$ ), 3.58 (s, 3 H,  $\text{CH}_3\text{O}$ ), 4.05-4.18 (m, 4 H,  $\text{P}(\text{O})(\text{OCH}_2\text{CH}_3)$ ), 5.4-5.5 (m, 1 H,  $\text{CH}$ ), 7.4-7.6 (m, 5 H,  $\text{C}_6\text{H}_5$ ).

Diastereoisomer (*S,R*).  $^{31}\text{P}$  NMR (600 MHz,  $\text{CDCl}_3$ )  $\delta$  (ppm) 25.16;  $^1\text{H}$  NMR (600 MHz,  $\text{CDCl}_3$ )  $\delta$  (ppm) 1.27-1.37 (m, 6 H,  $\text{P}(\text{O})(\text{OCH}_2\text{CH}_3)$ ), 1.54 (d, 3 H,  $J=6.1$  Hz,  $\text{CH}_3$ ), 2.0-2.3 (m, 2 H,  $\text{CH}_2\text{P}$ ), 3.58 (s, 3 H,  $\text{CH}_3\text{O}$ ), 4.05-4.18 (m, 4 H,  $\text{P}(\text{O})(\text{OCH}_2\text{CH}_3)$ ), 5.4-5.5 (m, 1 H,  $\text{CH}$ ), 7.4-7.6 (m, 5 H,  $\text{C}_6\text{H}_5$ ).

### (*R*)-MTPA esters of 2a

Diastereoisomer (*R,R*).  $^{31}\text{P}$  NMR (600 MHz,  $\text{CDCl}_3$ )  $\delta$  (ppm) 24.45;  $^1\text{H}$  NMR (600 MHz,  $\text{CDCl}_3$ )  $\delta$  (ppm) 1.20-1.23 (m, 3 H,  $\text{P}(\text{O})(\text{OCH}_2\text{CH}_3)$ ), 2.31-2.61 (m, 2 H,  $\text{CH}_2\text{P}$ ), 3.54 (s, 3 H,  $\text{CH}_3\text{O}$ ), 3.78-4.02 (m, 4 H,  $\text{P}(\text{O})(\text{OCH}_2\text{CH}_3)$ ), 6.22-6.33 (m, 1 H,  $\text{CH}$ ), 7.26-7.43 (m, 10 H,  $\text{C}_6\text{H}_5$ ).

Diastereoisomer (*S,R*).  $^{31}\text{P}$  NMR (600 MHz,  $\text{CDCl}_3$ )  $\delta$  (ppm) 24.29;  $^1\text{H}$  NMR (600 MHz,  $\text{CDCl}_3$ )  $\delta$  (ppm) 1.12-1.20 (td, 3 H,  $J=7.0$  Hz,  $\text{P}(\text{O})(\text{OCH}_2\text{CH}_3)$ ), 2.31-2.61 (m, 2 H,  $\text{CH}_2\text{P}$ ), 3.43 (s, 3 H,  $\text{CH}_3\text{O}$ ), 3.78-4.02 (m, 4 H,  $\text{P}(\text{O})(\text{OCH}_2\text{CH}_3)$ ), 6.22-6.33 (m, 1 H,  $\text{CH}$ ), 7.26-7.43 (m, 10 H,  $\text{C}_6\text{H}_5$ ).

### (*R*)-MTPA esters of 3a

Diastereoisomer (*R,R*).  $^{31}\text{P}$  NMR (600 MHz,  $\text{CDCl}_3$ )  $\delta$  (ppm) 25.59;  $^1\text{H}$  NMR (600 MHz,  $\text{CDCl}_3$ )  $\delta$  (ppm) 0.82-0.86 (t, 3 H,  $J=7.5$  Hz,  $\text{CH}_3\text{CH}_2\text{C}$ ), 1.29-1.35 (m, 6 H,  $\text{P}(\text{O})(\text{OCH}_2\text{CH}_3)$ ), 1.67-2.01 (m, 2 H,  $\text{CH}_3\text{CH}_2\text{C}$ ), 2.02-2.3 (m, 2 H,  $\text{CH}_2\text{P}$ ), 3.60 (s, 3 H,  $\text{CH}_3\text{O}$ ), 4.05-4.17 (m, 2 H,  $\text{P}(\text{O})(\text{OCH}_2\text{CH}_3)$ ), 5.26-5.35 (m, 1 H,  $\text{CH}$ ), 7.40-7.60 (m, 6 H,  $\text{C}_6\text{H}_5$ ).

Diastereoizomer (*S,R*).  $^{31}\text{P}$  NMR (600 MHz,  $\text{CDCl}_3$ )  $\delta$  (ppm) 25.52;  $^1\text{H}$  NMR (600 MHz,  $\text{CDCl}_3$ )  $\delta$  (ppm) 0.95-0.99 (t, 3 H,  $J=7.5$  Hz,  $\text{CH}_3\text{CH}_2\text{C}$ ), 1.29-1.35 (m, 6 H,  $\text{P}(\text{O})(\text{OCH}_2\text{CH}_3)$ ), 1.67-2.01 (m, 2 H,  $\text{CH}_3\text{CH}_2\text{C}$ ), 2.02-2.3 (m, 2 H,  $\text{CH}_2\text{P}$ ), 3.57 (s, 3 H,  $\text{CH}_3\text{O}$ ), 4.05-4.17 (m, 2 H,  $\text{P}(\text{O})(\text{OCH}_2\text{CH}_3)$ ), 5.26-5.35 (m, 1 H,  $\text{CH}$ ), 7.40-7.60 (m, 6 H,  $\text{C}_6\text{H}_5$ ).

## References

1. J. A. Dale, H. S. Mosher, *J. Am. Chem. Soc.*, 1973, **95**, 512.
2. A. Woschek, W. Lindner, F. Hammerschmidt, *Adv. Synth. Catal.*, 2003, **345**, 1287.
